# Supplementary material for: Physical Activity in Community Dwelling Older People: A Systematic Review of Reviews of Interventions and Context
Source: PubMed Central journal article supplement (PMC5173028; doi:10.1371/journal.pone.0168614), 2016-12-20
Supplement: pone.0168614.s004.pdf [file pone.0168614.s004.pdf]

S4 Table: Quality assessment of SR on PA effect on cognition in older adults

**AMSTAR (High= 8-11, Good= 5-7, Low= <5)**

Key: 1. 'a priori design; 2. duplicate study selection and data extraction; 3. comprehensive literature search; 4. Status of publication as an inclusion criterion; 5. List of studies (included and excluded provided)?; 6. Characteristics of the included studies provided? 7. Scientific quality of the included studies assessed and documented; 8. Scientific quality of the included studies considered in formulating conclusions; 9. Appropriate method to combine findings; 10. Publication bias; 11. Conflict of interest

| Author (Year)  | 1 | 2 | 3 | 4 | 5 | 6 | 7 | 8 | 9 | 10 | 11 | Ranking |
|----------------|---|---|---|---|---|---|---|---|---|----|----|---------|
| Angevaren 2008 | Y | Y | Y | N | Y | Y | Y | Y | Y | N  | N  | High    |
| Balsamo 2013   | N | N | Y | N | N | Y | N | N | N | N  | Y  | Low     |
| Cai 2015       | Y | N | Y | N | Y | Y | N | Y | N | N  | N  | Good    |
| Carvalho 2014  | Y | Y | Y | N | N | Y | Y | Y | Y | N  | Y  | High    |
| Chang 2012     | Y | U | Y | N | N | Y | U | Y | N | N  | N  | Low     |
| Coelho 2013    | Y | N | Y | N | N | Y | N | Y | Y | Y  | Y  | Good    |
| Colcombe 2003  | Y | N | Y | Y | N | N | N | Y | Y | N  | Y  | Good    |
| Gates 2013     | Y | Y | Y | N | N | Y | Y | Y | Y | N  | Y  | High    |
| Kelly 2014     | Y | Y | Y | Y | Y | Y | N | Y | Y | N  | Y  | High    |
| Ohman 2014     | Y | Y | Y | N | N | Y | Y | Y | Y | N  | Y  | High    |
| Patterson 2010 | Y | Y | Y | N | N | N | Y | Y | N | N  | Y  | Good    |
| Sherder 2014   | Y | Y | Y | N | N | Y | N | Y | Y | Y  | Y  | High    |
| Tseng 2011     | Y | Y | Y | Y | Y | Y | Y | Y | N | N  | N  | High    |
| Uffellen 2008  | Y | Y | Y | N | Y | Y | Y | Y | Y | N  | Y  | High    |
