# Supplementary material for: Physical Activity in Community Dwelling Older People: A Systematic Review of Reviews of Interventions and Context
Source: PubMed Central journal article supplement (PMC5173028; doi:10.1371/journal.pone.0168614), 2016-12-20
Supplement: pone.0168614.s005.pdf [file pone.0168614.s005.pdf]

S5 Table: Quality assessment of SRs on interventions to promote uptake of PA in older adults

**AMSTAR (High= 8-11, Good= 5-7, Low= <5)**

Key: 1. 'a priori design; 2. duplicate study selection and data extraction; 3. comprehensive literature search; 4. Status of publication as an inclusion criterion; 5. List of studies (included and excluded provided)?; 6. Characteristics of the included studies provided? 7. Scientific quality of the included studies assessed and documented; 8. Scientific quality of the included studies considered in formulating conclusions; 9. Appropriate method to combine findings; 10. Publication bias; 11. Conflict of interest

| Author (Year)     | 1 | 2 | 3 | 4 | 5 | 6 | 7 | 8 | 9 | 10 | 11 | Ranking |
|-------------------|---|---|---|---|---|---|---|---|---|----|----|---------|
| Asikainen 2004    | Y | U | Y | N | Y | Y | Y | Y | Y | N  | Y  | High    |
| Clegg 2012        | Y | Y | Y | N | N | Y | Y | Y | Y | N  | Y  | High    |
| Chase 2013        | Y | N | Y | N | N | Y | N | N | Y | N  | Y  | Good    |
| Chase 2014        | Y | U | Y | Y | N | Y | N | Y | Y | Y  | Y  | High    |
| Con 2003a         | Y | Y | Y | Y | N | Y | N | N | Y | N  | N  | Good    |
| Con 2003b         | Y | Y | Y | Y | N | Y | U | U | Y | N  | N  | Good    |
| Cyarto 2004       | Y | N | Y | N | N | N | N | U | Y | N  | Y  | Low     |
| de Vries 2012     | Y | Y | Y | N | N | Y | Y | Y | Y | N  | Y  | High    |
| Fairhall 2011     | Y | Y | Y | Y | Y | Y | Y | Y | Y | Y  | Y  | High    |
| French 2014       | Y | Y | Y | N | N | N | N | N | Y | N  | Y  | Good    |
| Geraedts 2013     | Y | Y | Y | N | N | Y | Y | Y | Y | N  | Y  | High    |
| Hobbs 2013        | Y | Y | Y | Y | N | N | Y | Y | Y | Y  | Y  | High    |
| Muller 2014       | Y | Y | Y | N | N | Y | Y | Y | Y | N  | Y  | High    |
| Neidrick 2012     | Y | Y | Y | N | N | Y | N | N | Y | N  | N  | Good    |
| Nigg 2012         | Y | Y | Y | N | N | Y | U | U | Y | N  | Y  | Good    |
| Stevens 2014      | Y | Y | Y | N | N | Y | Y | Y | Y | N  | Y  | High    |
| Van der Bijl 2002 | Y | Y | Y | N | N | Y | N | N | Y | N  | Y  | Good    |
